# Supplementary material for: Recovering Ancient Grapevine Cultivars in the Balearic Islands: Sanitary Status Evaluation and Virus Elimination
Source: MDPI journal article supplement (doi:10.3390/plants11131754), 2022-06-30
Supplement: s1 [file s1]

**Supplementary Table S1:** Incidence of virus in each cultivar (%). To simplify the interpretation of the results, GLRaV-1,-3 were grouped as single pathogen (GLRaVs), being both viruses associated to the same disease (Grapevine leafroll).

| Local Cultivars         | Virus Free | Virus Incidence |       |      |
|-------------------------|------------|-----------------|-------|------|
|                         |            | GLRaVs          | GFKV  | GFLV |
| Argamussa               | 0          | 100             | 100   | 0    |
| Batista Felanix         | 0          | 100             | 20    | 0    |
| Callet                  | 0          | 100             | 22.22 | 0    |
| Callet Negrella         | 0          | 71.42           | 42.85 | 0    |
| Calop Blanc             | 0          | 100             | 100   | 0    |
| Calop Negre             | 0          | 100             | 100   | 0    |
| Calop Roig              | 0          | 100             | 100   | 0    |
| Escursac                | 30.0       | 70              | 0     | 30   |
| Esperó de Gall          | 0          | 100             | 100   | 88.8 |
| Fernandella             | 37.5       | 5               | 25.0  | 0    |
| Fogoneu                 | 11.1       | 88.8            | 0     | 11.1 |
| Gafarró                 | 14.2       | 85.7            | 0     | 0    |
| Galmeter                | 0          | 100             | 100   | 100  |
| Giró Ros                | 60.0       | 40.0            | 0     | 0    |
| Gorgollassa             | 10.0       | 40.0            | 0     | 90.0 |
| Jaumes                  | 12.5       | 87.5            | 25.0  | 75.0 |
| Magdalena               | 0          | 100             | 0     | 0    |
| Malvasia de Banyalbufar | 31.2       | 68.7            | 6.2   | 6.2  |
| Mamella Vaca            | 0          | 100             | 0     | 0    |
| Mances de Capdell       | 0          | 94.4            | 50    | 44.4 |
| Mancés de Tibus         | 70         | 10              | 0     | 20   |
| Mandó                   | 0          | 37.5            | 100   | 0    |
| Manto negro             | 0          | 88.8            | 44.4  | 0    |
| Mateu                   | 0          | 100             | 0     | 0    |
| Molinera                | 0          | 100             | 0     | 0    |
| Moll                    | 0          | 100             | 66.6  | 0    |
| Quigat                  | 0          | 100             | 100   | 0    |
| Sabater                 | 0          | 100             | 22.2  | 88.8 |
| Sinso                   | 0          | 100             | 22    | 0    |
| Valent Blanc            | 0          | 100             | 58.3  | 100  |
| Valent Negre            | 0          | 100             | 100   | 77.7 |
| Vinater Blanc           | 0          | 100             | 100   | 0    |
| Vinater Tinto           | 0          | 76.4            | 58.8  | 52.9 |

## Supplementary material S2:

Nominal logistic model used to analyze the differences on the sanitary status among cultivars with the identity of the virus presented as response variable using JMP 10 software package.

### Nominal Logistic Fit for infeccion

#### Whole Model Test

| Model      | -LogLikelihood | DF  | ChiSquare | Prob>ChiSq |
|------------|----------------|-----|-----------|------------|
| Difference | 359,36461      | 384 | 718,7292  | <,0001     |
| Full       | 221,68686      |     |           |            |
| Reduced    | 581,05148      |     |           |            |

|                            |        |
|----------------------------|--------|
| RSquare (U)                | 0,6185 |
| Observations (or Sum Wgts) | 315    |

Converged by Objective

#### Effect Likelihood Ratio Tests

| Source   | Nparm | DF  | L-R ChiSquare | Prob>ChiSq |
|----------|-------|-----|---------------|------------|
| Variedad | 384   | 384 | 718,729224    | <,0001     |

Generalized linear models (GLM) with binomial distribution with sanitation treatments as fix factor and Gorgollassa plants infection resulted as respond variable fit using JMP 10 software package.

### Generalized Linear Model Fit

Response: virus presence

Distribution: Binomial

Link: Logit

Observations (or Sum Wgts) = 103

#### Whole Model Test

| Model      | -LogLikelihood | L-R ChiSquare | DF | Prob>ChiSq |
|------------|----------------|---------------|----|------------|
| Difference | 1,66689276     | 3,3338        | 1  | 0,0679     |
| Full       | 44,4716987     |               |    |            |
| Reduced    | 46,1385915     |               |    |            |

| Goodness Of Fit Statistic | ChiSquare | DF  | Prob>ChiSq |
|---------------------------|-----------|-----|------------|
| Pearson                   | 103,0000  | 101 | 0,4260     |
| Deviance                  | 88,9434   | 101 | 0,7988     |

**Effect Tests**

| Source    | DF | L-R | ChiSquare | Prob>ChiSq |
|-----------|----|-----|-----------|------------|
| treatment | 1  |     | 3,3337855 | 0,0679     |
